# Supplementary material for: Tumor Microenvironment-Responsive Magnetic Nanofluid for Enhanced Tumor MRI and Tumor multi-treatments
Source: MDPI journal article supplement (doi:10.3390/ph16020166), 2023-01-23
Supplement: s1 [file s1]

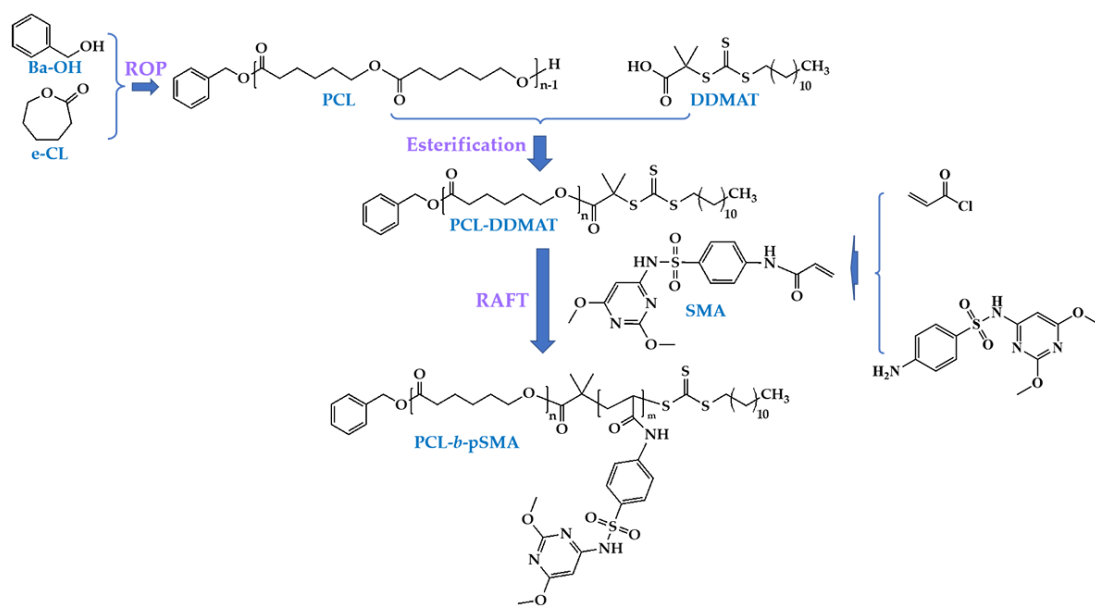

Figure S1: Synthetic scheme of PCL-*b*-pSMA

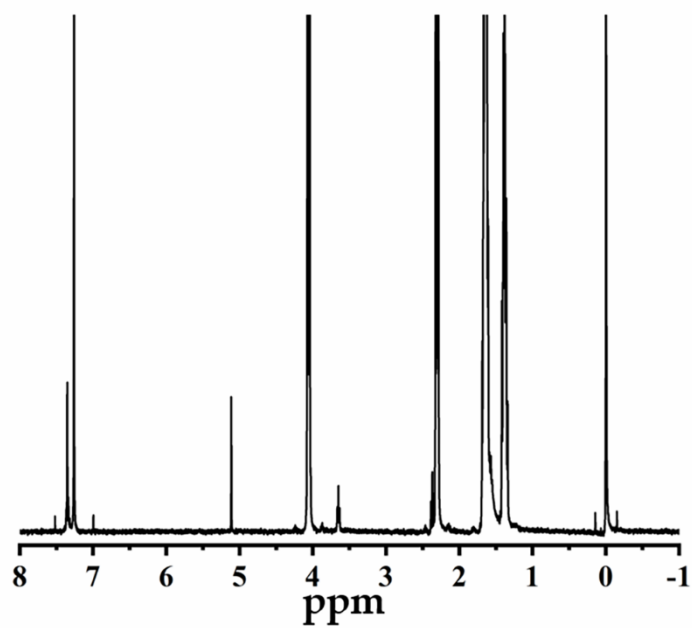

Figure S2:  $^1\text{H}$  NMR spectrum of PCL

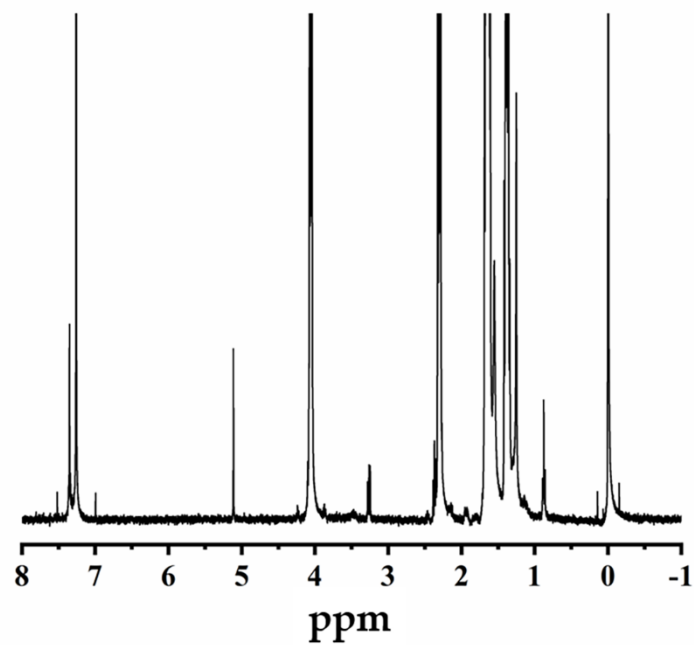

Figure S3: <sup>1</sup>H NMR spectrum of PCL-DDMAT

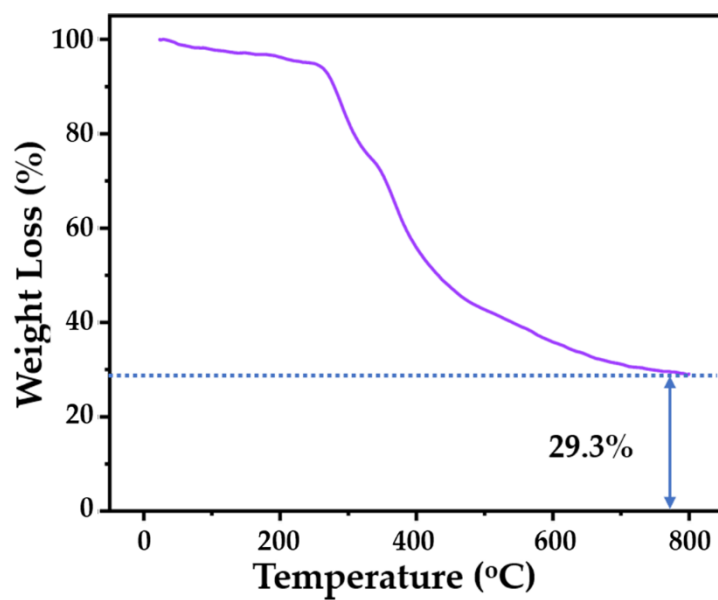

Figure S4: The content of Fe<sub>3</sub>O<sub>4</sub> in tumor microenvironment-responsive MNFs

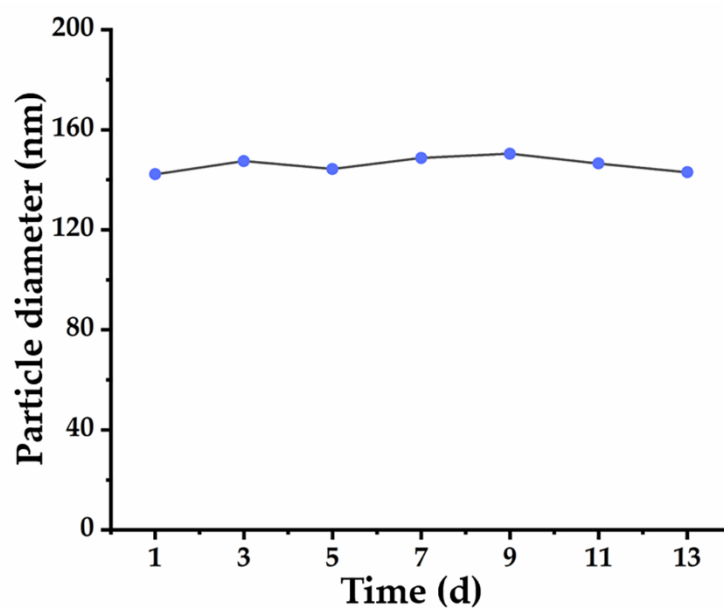

Figure S5: The time-dependent hydrodynamic diameter of tumor microenvironment-responsive MNFs in physiological condition

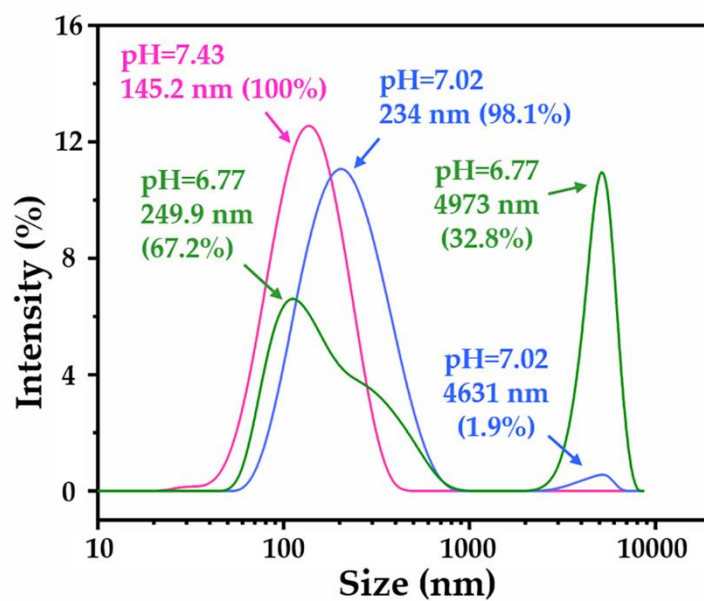

Figure S6: Particle sizes of tumor microenvironment-responsive MNFs in different pH values

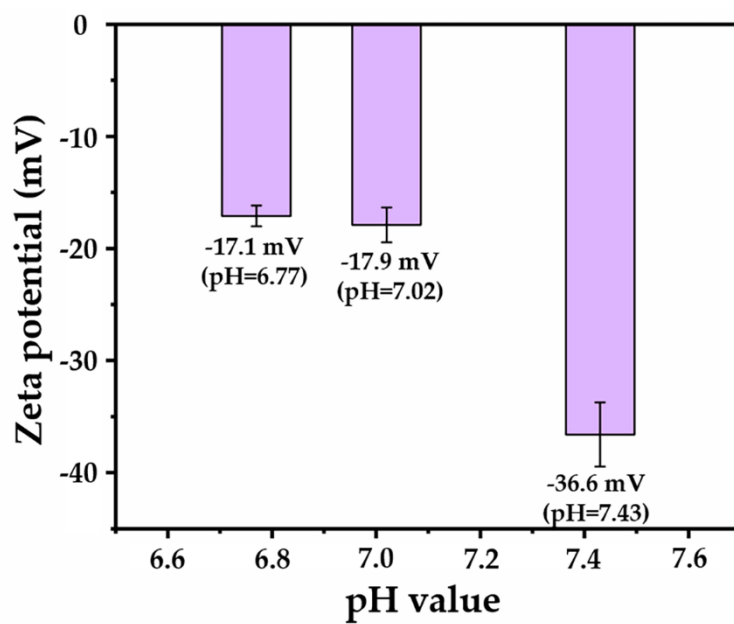

Figure S7: The content of  $\text{Fe}_3\text{O}_4$  in tumor microenvironment-responsive MNFs

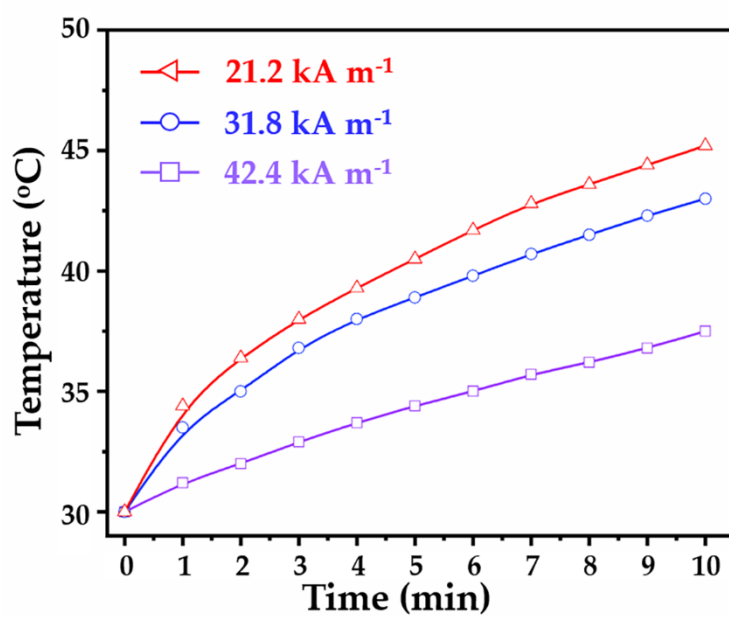

Figure S8: Time-dependent temperature curves of tumor microenvironment-responsive MNFs under AMF with different  $H_{\text{applied}}$
